# Supplementary material
Source: PubMed Central journal article supplement (PMC5487276)
Supplement: NIHMS858413-supplement-Supp_TableS1.pdf [file NIHMS858413-supplement-Supp_TableS1.pdf]

**Supplemental Table 1: ASXL1 protein truncating variants in ExAC**

| Chrom | Position | Ref Allele | Alt Allele | HGVs Nucleotide       | HGVs Protein       | Annotation      | Allele Count in ExAC | Ancestry               | ExAC Global Allele Frequency | Cancer / Not cancer Cohort                                                                                             | Sex                                                                      | Age (rounded)                                      | Allele Balance (% Alt Allele)                               | Present in ClinVar | Notes                            |
|-------|----------|------------|------------|-----------------------|--------------------|-----------------|----------------------|------------------------|------------------------------|------------------------------------------------------------------------------------------------------------------------|--------------------------------------------------------------------------|----------------------------------------------------|-------------------------------------------------------------|--------------------|----------------------------------|
| 20    | 30947563 | ATT        | A          | c.15_16delTT          | p.Phe6CysfsTer62   | frameshift      | 1                    | AFR                    | 0.0000561                    | Cancer                                                                                                                 | Female                                                                   | 45                                                 | 45%                                                         | no                 | Excluded - non-constitutive exon |
| 20    | 30955528 | A          | G          | c.141-2A>G            |                    | splice acceptor | 2                    | SAS (2)                | 0.00001648                   | Not cancer<br>Not cancer                                                                                               | Female<br>Male                                                           | 60<br>50                                           | 46%<br>47%                                                  | no                 | Excluded - non-constitutive exon |
| 20    | 31016126 | A          | G          | c.374-2A>G            |                    | splice acceptor | 1                    | EUR                    | 0.000008253                  | Cancer                                                                                                                 | Female                                                                   | NA                                                 | 42%                                                         | no                 |                                  |
| 20    | 31016127 | G          | A          | c.374-1G>A            |                    | splice acceptor | 1                    | EUR                    | 0.000008254                  | Not cancer                                                                                                             | Male                                                                     | NA                                                 | 45%                                                         | no                 |                                  |
| 20    | 31019423 | CA         | C          | c.921delA             | p.Leu308Ter        | frameshift      | 1                    | EUR                    | 0.000008239                  | Not cancer                                                                                                             | Male                                                                     | 50                                                 | 46%                                                         | no                 |                                  |
| 20    | 31021211 | C          | T          | c.1210C>T             | p.Arg404Ter        | stop gained     | 7                    | EUR (4), AFR, EAS, FIN | 0.00005767                   | Not cancer<br>Not cancer<br>Not cancer<br>Not cancer<br>Cancer<br>Cancer<br>Not cancer                                 | Male<br>Female<br>Male<br>Male<br>Female<br>Male<br>Male                 | 55<br>85<br>80<br>60<br>NA<br>NA<br>70             | 23%<br>42%<br>19%<br>21%<br>43%<br>13%<br>12%               | yes                |                                  |
| 20    | 31021250 | C          | T          | c.1249C>T             | p.Arg417Ter        | stop gained     | 9                    | EUR (6), FIN (2), EAS  | 0.00007414                   | Not cancer<br>Not cancer<br>Not cancer<br>Not cancer<br>Not cancer<br>Not cancer<br>Not cancer<br>Not cancer<br>Cancer | Male<br>Male<br>Male<br>Male<br>Male<br>Female<br>Male<br>Female<br>Male | 65<br>55<br>55<br>80<br>75<br>85<br>65<br>NA<br>75 | 22%<br>40%<br>32%<br>25%<br>18%<br>30%<br>18%<br>20%<br>32% | no                 |                                  |
| 20    | 31021295 | C          | T          | c.1294C>T             | p.Gln432Ter        | stop gained     | 3                    | EUR (3)                | 0.00002471                   | Not cancer<br>Not cancer<br>Cancer                                                                                     | Female<br>Male<br>Male                                                   | NA<br>50<br>80                                     | 23%<br>24%<br>31%                                           | no                 |                                  |
| 20    | 31021332 | C          | G          | c.1331C>G             | p.Ser444Ter        | stop gained     | 1                    | EUR                    | 0.000008238                  | Not cancer                                                                                                             | Male                                                                     | 80                                                 | 30%                                                         | no                 |                                  |
| 20    | 31021439 | G          | T          | c.1438G>T             | p.Glu480Ter        | stop gained     | 1                    | EUR                    | 0.000008246                  | Not cancer                                                                                                             | Female                                                                   | 50                                                 | 17%                                                         | no                 |                                  |
| 20    | 31021535 | C          | T          | c.1534C>T             | p.Gln512Ter        | stop gained     | 5                    | EUR (5)                | 0.00004123                   | Not cancer<br>Not cancer<br>Cancer<br>Cancer<br>Cancer                                                                 | Female<br>Male<br>Male<br>Male<br>Male                                   | 55<br>45<br>65<br>NA<br>NA                         | 11%<br>25%<br>15%<br>29%<br>38%                             | no                 |                                  |
| 20    | 31021538 | G          | T          | c.1537G>T             | p.Glu513Ter        | stop gained     | 1                    | EUR                    | 0.000008245                  | Cancer                                                                                                                 | Female                                                                   | 65                                                 | 46%                                                         | no                 |                                  |
| 20    | 31021565 | C          | T          | c.1564C>T             | p.Gln522Ter        | stop gained     | 1                    | EUR                    | 0.00000825                   | Not cancer                                                                                                             | Male                                                                     | 55                                                 | 39%                                                         | no                 |                                  |
| 20    | 31021610 | G          | T          | c.1609G>T             | p.Glu537Ter        | stop gained     | 1                    | EUR                    | 0.000008282                  | Not cancer                                                                                                             | Female                                                                   | NA                                                 | 37%                                                         | no                 |                                  |
| 20    | 31021627 | T          | TGAAGATC   | c.1626delTinsTGAAGATC | p.Gln546ArgfsTer7  | frameshift      | 1                    | EUR                    | 0.0000083                    | Not cancer                                                                                                             | Male                                                                     | 85                                                 | 27%                                                         | no                 |                                  |
| 20    | 31021642 | C          | CT         | c.1641_1642insT       | p.Arg549SerfsTer2  | frameshift      | 1                    | EUR                    | 0.000008321                  | Cancer                                                                                                                 | Male                                                                     | 75                                                 | 34%                                                         | no                 |                                  |
| 20    | 31022233 | A          | G          | c.1720-2A>G           |                    | splice acceptor | 2                    | EUR (2)                | 0.00001678                   | Not cancer<br>Not cancer                                                                                               | Female<br>Male                                                           | 85<br>70                                           | 50%<br>11%                                                  | no                 |                                  |
| 20    | 31022238 | C          | T          | c.1723C>T             | p.Gln575Ter        | stop gained     | 2                    | AFR, EUR               | 0.00001675                   | Not cancer<br>Cancer                                                                                                   | Male<br>Male                                                             | 75<br>75                                           | 15%<br>33%                                                  | no                 |                                  |
| 20    | 31022263 | G          | A          | c.1748G>A             | p.Trp583Ter        | stop gained     | 2                    | EUR (2)                | 0.00001666                   | Not cancer<br>Not cancer                                                                                               | Male<br>Male                                                             | 50<br>80                                           | 10%<br>41%                                                  | no                 |                                  |
| 20    | 31022265 | G          | GT         | c.1750_1751insT       | p.Val585GlyfsTer2  | frameshift      | 1                    | EUR                    | 0.000008325                  | Cancer                                                                                                                 | Female                                                                   | NA                                                 | 26%                                                         | no                 |                                  |
| 20    | 31022284 | CTT        | C          | c.1770_1771delTT      | p.Tyr591ProfTer27  | frameshift      | 1                    | Other                  | 0.00000831                   | Cancer                                                                                                                 | Male                                                                     | 55                                                 | 33%                                                         | no                 |                                  |
| 20    | 31022288 | C          | A          | c.1773C>A             | p.Tyr591Ter        | stop gained     | 4                    | EUR (3), SAS           | 0.00003326                   | Not cancer<br>Not cancer<br>Cancer<br>Cancer                                                                           | Male<br>Male<br>Female<br>Male                                           | 45<br>70<br>NA<br>NA                               | 17%<br>11%<br>18%<br>26%                                    | no                 |                                  |
| 20    | 31022288 | C          | G          | c.1773C>G             | p.Tyr591Ter        | stop gained     | 3                    | EUR (3)                | 0.00002495                   | Not cancer<br>Not cancer<br>Cancer                                                                                     | Male<br>Female<br>Female                                                 | 65<br>70<br>NA                                     | 12%<br>29%<br>13%                                           | no                 |                                  |
| 20    | 31022297 | C          | A          | c.1782C>A             | p.Cys594Ter        | stop gained     | 1                    | AFR                    | 0.000008323                  | Not cancer                                                                                                             | Male                                                                     | 45                                                 | 16%                                                         | no                 |                                  |
| 20    | 31022365 | T          | TA         | c.1850_1851insA       | p.Lys618Ter        | frameshift      | 1                    | AMR                    | 0.000008494                  | Not cancer                                                                                                             | Male                                                                     | 75                                                 | 15%                                                         | no                 |                                  |
| 20    | 31022386 | T          | TC         | c.1871_1872insC       | p.Arg625ProfTer10  | frameshift      | 1                    | EUR                    | 0.000008824                  | Not cancer                                                                                                             | Male                                                                     | 80                                                 | 35%                                                         | no                 |                                  |
| 20    | 31022414 | TAG        | T          | c.1900_1901delAG      | p.Glu635GlyfsTer22 | frameshift      | 1                    | EUR                    | 0.000009443                  | Not cancer                                                                                                             | Female                                                                   | 80                                                 | 30%                                                         | no                 |                                  |
| 20    | 31022441 | AGG        | A          | c.1926_1928delAGGinsA | p.Gly645TrpfsTer12 | frameshift      | 1                    | EUR                    | 0.00001238                   | Cancer                                                                                                                 | Male                                                                     | 60                                                 | 18%                                                         | no                 |                                  |
| 20    | 31022592 | C          | T          | c.2077C>T             | p.Arg693Ter        | stop gained     | 6                    | EUR (3), EAS (2), AFR  | 0.0000502                    | Not cancer<br>Not cancer<br>Not cancer<br>Not cancer<br>Not cancer                                                     | Male<br>Female<br>Female<br>Female<br>Male                               | 60<br>55<br>65<br>75<br>65<br>60                   | 13%<br>14%<br>59%<br>14%<br>19%<br>14%                      | no                 |                                  |
| 20    | 31022642 | CG         | C          | c.2127_2128delCGinsC  | p.Gly710GlyfsTer15 | frameshift      | 1                    | SAS                    | 0.00000828                   | Not cancer                                                                                                             | Male                                                                     | 75                                                 | 33%                                                         | no                 |                                  |

|    |          |     |     |                           |                      |             |   |              |            |            |        |    |     |     |                                                |
|----|----------|-----|-----|---------------------------|----------------------|-------------|---|--------------|------------|------------|--------|----|-----|-----|------------------------------------------------|
| 20 | 31022669 | AG  | A   | c.2155delG                | p.Glu719ArgfsTer6    | frameshift  | 1 | AFR          | 0.00008267 | Cancer     | Male   | 60 | 34% | no  |                                                |
| 20 | 31022688 | A   | T   | c.2173A>T                 | p.Arg725Ter          | stop gained | 1 | EUR          | 0.00008263 | Not cancer | Male   | 75 | 25% | no  |                                                |
| 20 | 31022711 | AC  | A   | c.2197delC                | p.Gln733ArgfsTer11   | frameshift  | 1 | EUR          | 0.0000826  | Cancer     | Female | NA | 36% | no  |                                                |
| 20 | 31022817 | C   | T   | c.2302C>T                 | p.Gln768Ter          | stop gained | 2 | EUR (2)      | 0.0000165  | Not cancer | Female | 75 | 42% | no  |                                                |
|    |          |     |     |                           |                      |             |   |              |            | Cancer     | Female | NA | 28% |     |                                                |
| 20 | 31022839 | T   | G   | c.2324T>G                 | p.Leu775Ter          | stop gained | 1 | EUR          | 0.00008253 | Cancer     | Female | 55 | 19% | no  |                                                |
| 20 | 31022853 | C   | T   | c.2338C>T                 | p.Gln780Ter          | stop gained | 1 | AMR          | 0.00008262 | Not cancer | Female | 70 | 31% | no  |                                                |
| 20 | 31022922 | C   | T   | c.2407C>T                 | p.Gln803Ter          | stop gained | 3 | AMR (2), EUR | 0.00002485 | Not cancer | Male   | 75 | 18% | no  |                                                |
|    |          |     |     |                           |                      |             |   |              |            | Not cancer | Male   | 55 | 30% |     |                                                |
|    |          |     |     |                           |                      |             |   |              |            | Not cancer | Male   | 60 | 11% |     |                                                |
| 20 | 31022981 | AT  | A   | c.2467delT                | p.Leu823Ter          | frameshift  | 2 | AFR, EUR     | 0.00001656 | Not cancer | Female | 80 | 43% | no  |                                                |
|    |          |     |     |                           |                      |             |   |              |            | Not cancer | Female | 60 | 9%  |     |                                                |
| 20 | 31022991 | G   | T   | c.2476G>T                 | p.Gly826Ter          | stop gained | 1 | EUR          | 0.0000828  | Not cancer | Female | 80 | 13% | no  |                                                |
| 20 | 31023083 | C   | A   | c.2568C>A                 | p.Cys856Ter          | stop gained | 1 | EUR          | 0.00008247 | Not cancer | Male   | NA | 18% | no  |                                                |
| 20 | 31023156 | A   | T   | c.2641A>T                 | p.Arg881Ter          | stop gained | 1 | EUR          | 0.00008236 | Not cancer | Male   | 75 | 30% | no  |                                                |
| 20 | 31023209 | G   | A   | c.2694G>A                 | p.Trp898Ter          | stop gained | 2 | EUR (2)      | 0.00001648 | Not cancer | Female | 70 | 21% | no  |                                                |
|    |          |     |     |                           |                      |             |   |              |            | Cancer     | Male   | NA | 15% |     |                                                |
| 20 | 31023271 | T   | TA  | c.2756delTinsTA           | p.Pro920ThrfsTer4    | frameshift  | 1 | AMR          | 0.00008242 | Not cancer | Male   | 85 | 22% | no  |                                                |
| 20 | 31023408 | C   | T   | c.2893_2896delCGAGinsTGAG | p.Arg965Ter          | stop gained | 1 | EUR          | 0.00008244 | Not cancer | Female | 85 | 21% | yes |                                                |
| 20 | 31023446 | GGT | G   | c.2931_2933delGGTinsG     | p.Val978GlyfsTer3    | frameshift  | 1 | EUR          | 0.00008241 | Not cancer | Female | 60 | 18% | no  |                                                |
| 20 | 31023473 | C   | CGT | c.2958delCinsCGT          | p.Gly987ValfsTer7    | frameshift  | 1 | EUR          | 0.00008241 | Not cancer | Female | 60 | 18% | no  |                                                |
| 20 | 31023717 | C   | T   | c.3202C>T                 | p.Arg1068Ter         | stop gained | 1 | EUR          | 0.00008238 | Not cancer | Male   | 65 | 22% | no  |                                                |
| 20 | 31024165 | C   | CAA | c.3650_3651insAA          | p.Asn1218LysfsTer63  | frameshift  | 1 | EUR          | 0.00008272 | Not cancer | Female | 45 | 51% | no  |                                                |
| 20 | 31024273 | G   | GC  | c.3758_3759insC           | p.Asn1254Ter         | frameshift  | 1 | EUR          | 0.00008249 | Not cancer | Male   | 70 | 49% | no  |                                                |
| 20 | 31024279 | CA  | C   | c.3765delA                | p.Asn1256MetfsTer24  | frameshift  | 1 | EUR          | 0.00008241 | Not cancer | Female | 75 | 36% | no  |                                                |
| 20 | 31024499 | GA  | G   | c.3985delA                | p.Ile1329SerfsTer121 | frameshift  | 2 | SAS (2)      | 0.00001655 | Not cancer | Male   | 70 | 46% | no  | Excluded<br>- complex indel with variant below |
|    |          |     |     |                           |                      |             |   |              |            | Not cancer | Male   | 75 | 36% |     |                                                |
| 20 | 31024502 | C   | CA  | c.3987_3988insA           | p.Pro1330ThrfsTer41  | frameshift  | 2 | SAS (2)      | 0.00001654 | Not cancer | Male   | 70 | 45% | no  | Excluded<br>- complex indel with variant above |
|    |          |     |     |                           |                      |             |   |              |            | Not cancer | Male   | 75 | 37% |     |                                                |
| 20 | 31024563 | C   | T   | c.4048C>T                 | p.Gln1350Ter         | stop gained | 1 | AMR          | 0.00008258 | Cancer     | Female | NA | 56% | no  |                                                |
| 20 | 31025057 | CAT | C   | c.4542_4544delCATinsC     | p.Met1515ValfsTer11  | frameshift  | 1 | EUR          | 0.00008246 | Not cancer | Male   | NA | 45% | no  |                                                |

**Data averaged across individuals**

|    |          |    |    |                          |                    |            |     |                                                           |          |                                                   |              |                                                                                                 |                                                                      |    |                                  |
|----|----------|----|----|--------------------------|--------------------|------------|-----|-----------------------------------------------------------|----------|---------------------------------------------------|--------------|-------------------------------------------------------------------------------------------------|----------------------------------------------------------------------|----|----------------------------------|
| 20 | 31022441 | A  | AG | c.1926_1928delAGGinsAGGG | p.Gly646TrpfsTer12 | frameshift | 132 | EUR (95), SAS (13), AFR (12), AMR (7), EAS (3), Other (2) | 0.001634 | Majority Cancer (66%)<br>Cancer<br>Not cancer     | Female (72%) | 64.8 (data available for 36%)<br>67.9 (data available for 8%)<br>64.3 (data available for 91%)  | 24% (median 21.8%)<br>22.7% (median 21.4%)<br>26.4% (median 23.1%)   | no | Excluded<br>- homopolymer region |
| 20 | 31022441 | AG | A  | c.1926_1928delAGGinsAG   | p.Gly645ValfsTer58 | frameshift | 118 | EUR (58), SAS (24), AMR (17), EAS (11), AFR (7), FIN (1)  | 0.00146  | Majority Not cancer (92%)<br>Cancer<br>Not cancer | Male (62%)   | 56.8 (data available for 85%)<br>65.0 (data available for 50%)<br>56.3 (data available for 88%) | 16.9% (median 15.4%)<br>16.3% (median 16.7%)<br>17.0% (median 15.2%) | no | Excluded<br>- homopolymer region |

Legend: Samples in figure 2 are marked in bold in columns K through N.
